# Supplementary material
Source: PubMed Central journal article supplement (PMC7124887)
Supplement: EMS85017-supplement-Supplementary_File.pdf [file EMS85017-supplement-Supplementary_File.pdf]

**Supplementary Table 1.** Taxa included in the largest dataset (dataset 1; see Methods). Phylum, scientific name, taxon code in the analyses, type of data (genome or transcriptome) and accession number are indicated for each taxon.

| Phylum     | Scientific name                       | Taxon Code                  | Genome/Transcriptome | Accession Number |
|------------|---------------------------------------|-----------------------------|----------------------|------------------|
| Acoela     | <i>Childia submaculatum</i>           | ACOE_Chil                   | Transcriptome        | SRX1534054       |
| Acoela     | <i>Convolutriloba macropyla</i>       | ACOE_Conv                   | Transcriptome        | SRX1343815       |
| Acoela     | <i>Diopisthoporus gymnopharyngeus</i> | ACOE_Diog                   | Transcriptome        | SRX1534055       |
| Acoela     | <i>Diopisthoporus longitubus</i>      | ACOE_Diol                   | Transcriptome        | SRR3105704       |
| Acoela     | <i>Eumecynostomum macrobursalium</i>  | ACOE_Eumc                   | Transcriptome        | SRX1534057       |
| Acoela     | <i>Hofstenia miamia</i>               | ACOE_Hmia2                  | Transcriptome        | SRR1208932       |
| Acoela     | <i>Isodiametra pulchra</i>            | ACOE_Isop                   | Transcriptome        | SRX3469680       |
| Acoela     | <i>Neochildia fusca</i>               | ACOE_Nfus                   | Transcriptome        | SRR8617822       |
| Acoela     | <i>Symsagittifera roscoffensis</i>    | ACOE_Sros                   | Transcriptome        | SRR827579        |
| Annelida   | <i>Capitella teleta</i>               | ANNE_Capitella<br>_teleta   | Genome               | PRJNA175705      |
| Annelida   | <i>Diurodrilus subterraneus</i>       | ANNE_Diur                   | Transcriptome        | SRR2131612       |
| Annelida   | <i>Helobdella robusta</i>             | ANNE_Helobdella<br>_robusta | Genome               | PRJNA259764      |
| Annelida   | <i>Lobatocerebrum sp.</i>             | ANNE_Loba                   | Transcriptome        | SRR2131397       |
| Annelida   | <i>Lumbricus rubellus</i>             | ANNE_Lrub                   | Transcriptome        | SRR923752        |
| Annelida   | <i>Marphysa bellii</i>                | ANNE_Mbel                   | Transcriptome        | SRR1232821       |
| Annelida   | <i>Magelona johnstoni</i>             | ANNE_Mjoh                   | Transcriptome        | SRR1222290       |
| Annelida   | <i>Myzostomatidae sp.</i>             | ANNE_Myzo                   | Transcriptome        | SRR2008168       |
| Annelida   | <i>Nephtys caeca</i>                  | ANNE_Ncae                   | Transcriptome        | SRR1232685       |
| Annelida   | <i>Owenia fusiformis</i>              | ANNE_Ofus                   | Transcriptome        | SRX1015948       |
| Annelida   | <i>Paramphinome jeffreysii</i>        | ANNE_Pamp                   | Transcriptome        | SRR1257731       |
| Annelida   | <i>Phylo foetida</i>                  | ANNE_Pfoe                   | Transcriptome        | SRR1222216       |
| Annelida   | <i>Phyllochaetopterus sp.</i>         | ANNE_Phyl                   | Transcriptome        | SRR1257898       |
| Annelida   | <i>Phascolopsis sp.</i>               | ANNE_Plcs                   | Transcriptome        | SRR1654498       |
| Arthropoda | <i>Acyrtosiphon pisum</i>             | ARTH_Acyrtosiphon<br>_pisum | Genome               | PRJNA29489       |
| Arthropoda | <i>Anoplodactylus insignis</i>        | ARTH_Ains                   | Transcriptome        | SRR5237777       |

|             |                                  |                                |               |             |
|-------------|----------------------------------|--------------------------------|---------------|-------------|
| Arthropoda  | <i>Apis mellifera</i>            | ARTH_Amel                      | Genome        | PRJNA477511 |
| Arthropoda  | <i>Anopheles gambiae</i>         | ARTH_Anopheles_gambiae         | Genome        | PRJNA163    |
| Arthropoda  | <i>Belgica antarctica</i>        | ARTH_Belgica_antarctica        | Genome        | PRJNA172148 |
| Arthropoda  | <i>Calanus finmarchicus</i>      | ARTH_Cfin                      | Transcriptome | SRX2085862  |
| Arthropoda  | <i>Culex quinquefasciatus</i>    | ARTH_Culex_quinquefasciatus    | Genome        | PRJNA29017  |
| Arthropoda  | <i>Daphnia pulex</i>             | ARTH_Dpul                      | Genome        | PRJNA12756  |
| Arthropoda  | <i>Drosophila melanogaster</i>   | ARTH_Dmel                      | Genome        | PRJNA13812  |
| Arthropoda  | <i>Eudigraphis taiwanensis</i>   | ARTH_Etai                      | Transcriptome | SRR3458640  |
| Arthropoda  | <i>Eurytemora affinis</i>        | ARTH_Eurytemora_affinis        | Genome        | PRJNA423276 |
| Arthropoda  | <i>Folsomia candida</i>          | ARTH_Fcan                      | Transcriptome | SRX321913   |
| Arthropoda  | <i>Fenneropenaeus merguensis</i> | ARTH_Fmer                      | Transcriptome | SRR1756093  |
| Arthropoda  | <i>Glomeris marginata</i>        | ARTH_Gmar                      | Transcriptome | SRR3233211  |
| Arthropoda  | <i>Ixodes scapularis</i>         | ARTH_Isca                      | Genome        | PRJNA34667  |
| Arthropoda  | <i>Lepeophtheirus salmonis</i>   | ARTH_Lepeophtheirus_salmonis   | Genome        | PRJNA280127 |
| Arthropoda  | <i>Limulus polyphemus</i>        | ARTH_Limu                      | Genome        | PRJNA238073 |
| Arthropoda  | <i>Parasteatoda tepidariorum</i> | ARTH_Parasteatoda_tepidariorum | Genome        | PRJNA316108 |
| Arthropoda  | <i>Sarcoptes scabiei</i>         | ARTH_Sarcoptes_scabiei         | Genome        | PRJNA268368 |
| Arthropoda  | <i>Scutigera coleoptrata</i>     | ARTH_Scuti                     | Transcriptome | SRX462011   |
| Arthropoda  | <i>Stegodyphus mimosarum</i>     | ARTH_Smim                      | Genome        | PRJNA222714 |
| Arthropoda  | <i>Strigamia maritima</i>        | ARTH_Strigamia_maritima        | Genome        | PRJNA20501  |
| Brachiopoda | <i>Glottidia pyramidata</i>      | BRAC_Gpyr                      | Transcriptome | SRX731468   |
| Brachiopoda | <i>Hemithiris psittacea</i>      | BRAC_Hpst                      | Transcriptome | SRX731469   |

|                 |                                  |                             |               |             |
|-----------------|----------------------------------|-----------------------------|---------------|-------------|
| Brachiopoda     | <i>Kraussina rubra</i>           | BRAC_Krub                   | Transcriptome | SRX1122037  |
| Brachiopoda     | <i>Lingula anatina</i>           | BRAC_Lana                   | Genome        | PRJNA293030 |
| Brachiopoda     | <i>Novocrania anomala</i>        | BRAC_Nvcn                   | Transcriptome | SRX1343816  |
| Brachiopoda     | <i>Terebratalia transversa</i>   | BRAC_Ttvs                   | Transcriptome | SRX1307070  |
| Bryozoa         | <i>Bugula stolonifera</i>        | BRYO_Bstl                   | Transcriptome | SRX6428326  |
| Bryozoa         | <i>Flustrellidra corniculata</i> | BRYO_Fcor                   | Transcriptome | SRX6428327  |
| Bryozoa         | <i>Heteropora pacifica</i>       | BRYO_Hpac                   | Transcriptome | SRX6441460  |
| Bryozoa         | <i>Membranipora membranacea</i>  | BRYO_Mmem                   | Transcriptome | SRX1121923  |
| Cephalochordata | <i>Asymmetron lucayanum</i>      | CEPH_Aluc                   | Transcriptome | SRX1444258  |
| Cephalochordata | <i>Branchiostoma floridae</i>    | CEPH_Bflo                   | Genome        | PRJNA33245  |
| Cephalochordata | <i>Branchiostoma belcheri</i>    | CEPH_Branchiostoma_belcheri | Genome        | PRJNA358734 |
| Chaetognatha    | <i>Sagitta elegans</i>           | CHAE_Selg                   | Transcriptome | SRX4610655  |
| Chaetognatha    | <i>Spadella cephaloptera</i>     | CHAE_Spdl                   | Transcriptome | SRX4610647  |
| Cnidaria        | <i>Acropora digitifera</i>       | CNID_Adig                   | Genome        | PRJNA314803 |
| Cnidaria        | <i>Abylopsis tetragona</i>       | CNID_Atet                   | Transcriptome | SRX288276   |
| Cnidaria        | <i>Craspedacusta sowerbyi</i>    | CNID_Csow                   | Transcriptome | SRX1988389  |
| Cnidaria        | <i>Gorgonia ventalina</i>        | CNID_Gven                   | Transcriptome | SRX177804   |
| Cnidaria        | <i>Hydra vulgaris</i>            | CNID_Hydra_vulgaris         | Genome        | PRJNA31231  |
| Cnidaria        | <i>Nematostella vectensis</i>    | CNID_Nvec                   | Genome        | PRJNA19965  |
| Cnidaria        | <i>Orbicella faveolata</i>       | CNID_Orbicella_alveolata    | Genome        | PRJNA381078 |
| Cnidaria        | <i>Polypodium hydriforme</i>     | CNID_Phyd                   | Transcriptome | SRX687102   |
| Cnidaria        | <i>Stomolophus meleagris</i>     | CNID_Smel                   | Transcriptome | SRX470083   |
| Cnidaria        | <i>Stylophora pistillata</i>     | CNID_Stylophora_pistillata  | Genome        | PRJNA415215 |
| Cnidaria        | <i>Thelohanellus kitauei</i>     | CNID_Thelohanellus_kitauei  | Genome        | PRJNA193083 |
| Craniata        | <i>Balearica regulorum</i>       | CRAN_Balearica_regulorum    | Genome        | PRJNA264996 |

|                   |                                   |                                 |               |             |
|-------------------|-----------------------------------|---------------------------------|---------------|-------------|
| Craniata          | <i>Callorhincus milii</i>         | CRAN_Cmil                       | Transcriptome | SRX154857   |
| Craniata          | <i>Danio rerio</i>                | CRAN_Drer                       | Genome        | PRJNA13922  |
| Craniata          | <i>Gekko japonicus</i>            | CRAN_Gekko_j<br>aponicus        | Genome        | PRJNA308133 |
| Craniata          | <i>Gallus gallus</i>              | CRAN_Ggal                       | Genome        | PRJNA10808  |
| Craniata          | <i>Gorilla gorilla</i>            | CRAN_Gorilla_g<br>orilla        | Genome        | PRJNA169344 |
| Craniata          | <i>Homo sapiens</i>               | CRAN_Hsap                       | Genome        | PRJNA168    |
| Craniata          | <i>Latimeria<br/>chalumnae</i>    | CRAN_Lcha                       | Genome        | PRJNA219830 |
| Craniata          | <i>Limosa lapponica</i>           | CRAN_Limosa_l<br>apponica       | Genome        | PRJNA321163 |
| Craniata          | <i>Mus musculus</i>               | CRAN_Mmus                       | Genome        | PRJNA169344 |
| Craniata          | <i>Parus major</i>                | CRAN_Pmar                       | Genome        | PRJNA312399 |
| Craniata          | <i>Poecilia mexicana</i>          | CRAN_Poecilia_<br>mexicana      | Genome        | PRJNA305619 |
| Craniata          | <i>Rana catesbeiana</i>           | CRAN_Rana_ca<br>tesbeiana       | Genome        | PRJNA285814 |
| Craniata          | <i>Scopththalmus<br/>maximus</i>  | CRAN_Scopthth<br>almus_maximus  | Genome        | PRJEB11743  |
| Ctenoph<br>ora    | <i>Beroe abyssicola</i>           | CTEN_Baby                       | Transcriptome | SRX250323   |
| Ctenoph<br>ora    | <i>Euplokamis<br/>dunlapae</i>    | CTEN_Edun                       | Transcriptome | SRX250313   |
| Ctenoph<br>ora    | <i>Mnemiopsis leidy</i>           | CTEN_Mnemiop<br>sis_leidy       | Genome        | PRJNA64405  |
| Ctenoph<br>ora    | <i>Pleurobrachia<br/>bachei</i>   | CTEN_Pleurobr<br>achia_bachei   | Genome        | PRJNA213480 |
| Ctenoph<br>ora    | <i>Vallicula multiformis</i>      | CTEN_Vmul                       | Transcriptome | SRX1716825  |
| Cyclioph<br>ora   | <i>Symbion pandora</i>            | CYCL_SyRN                       | Transcriptome | SRX1531719  |
| Cyclioph<br>ora   | <i>Symbion cf.<br/>americanus</i> | CYCL_Symb                       | Transcriptome | SRX6429431  |
| Dyciemi<br>da     | <i>Dyciema sp.</i>                | DICY_Dyciema_<br>sp             | Transcriptome | SRX265465   |
| Dyciemi<br>da     | <i>Dyciema japonicum</i>          | DICY_Dyciema_<br>japonica       | Transcriptome | DRX051953   |
| Echinod<br>ermata | <i>Acanthaster planci</i>         | ECHI_Acanthast<br>er_planci     | Genome        | PRJNA397419 |
| Echinod<br>ermata | <i>Apostichopus<br/>japonicus</i> | ECHI_Aposticho<br>pus_japonicus | Genome        | SRR1185973  |
| Echinod<br>ermata | <i>Euclidaris tribuloides</i>     | ECHI_Etri                       | Transcriptome | SRX1392319  |

|                 |                                      |                       |               |            |
|-----------------|--------------------------------------|-----------------------|---------------|------------|
| Echinodermata   | <i>Holothuria glaberrima</i>         | ECHI_Hgla             | Transcriptome | SRX4893169 |
| Echinodermata   | <i>Lytechinus variegatus</i>         | ECHI_Lvar             | Genome        | PRJNA62399 |
| Echinodermata   | <i>Ophiocoma echinata</i>            | ECHI_Oech             | Transcriptome | SRX445856  |
| Echinodermata   | <i>Oxycomanthus japonicus</i>        | ECHI_Ojap             | Transcriptome | SRX447395  |
| Echinodermata   | <i>Ophioderma longicauda</i>         | ECHI_Olon             | Transcriptome | SRX2464216 |
| Echinodermata   | <i>Patiria miniata</i>               | ECHI_Pmin             | Genome        | PRJNA49323 |
| Echinodermata   | <i>Sclerodactyla briareus</i>        | ECHI_Sbria            | Transcriptome | SRX445858  |
| Echinodermata   | <i>Strongylocentrotus purpuratus</i> | ECHI_Spur             | Genome        | PRJNA13728 |
| Entoprocta      | <i>Barentsia gracilis</i>            | ENTO_Bgra             | Transcriptome | SRX731475  |
| Entoprocta      | <i>Loxosoma pectinaricola</i>        | ENTO_Loxp             | Transcriptome | SRX731476  |
| Entoprocta      | <i>Loxomitra sp.</i>                 | ENTO_Lxmt             | Transcriptome | SRX6354877 |
| Entoprocta      | <i>Pedicellina sp. FHL</i>           | ENTO_PclF             | Transcriptome | SRR8641402 |
| Gastrotricha    | <i>Diuronotus sp.</i>                | GAST_Dnot             | Transcriptome | SRX1121926 |
| Gastrotricha    | <i>Lepidodermella squamata</i>       | GAST_Lepi             | Transcriptome | SRX534865  |
| Gastrotricha    | <i>Macrodasys sp.</i>                | GAST_Mdas             | Transcriptome | SRX534826  |
| Gastrotricha    | <i>Megadasys sp.</i>                 | GAST_Megd             | Transcriptome | SRX534835  |
| Gnathostomulida | <i>Austrognathia sp.</i>             | GNAT_Augn             | Transcriptome | SRX997150  |
| Gnathostomulida | <i>Gnathostomulidae sp.</i>          | GNAT_Gnat             | Transcriptome | SRR1271607 |
| Gnathostomulida | <i>Tenuignathia rikerae</i>          | GNAT_Trik             | Transcriptome | SRX6430999 |
| Hemichordata    | <i>Cephalodiscus gracilis</i>        | HEMI_Cgra             | Transcriptome | SRR1695473 |
| Hemichordata    | <i>Ptychodera bahamensis</i>         | HEMI_Pbah             | Transcriptome | SRR1695458 |
| Hemichordata    | <i>Ptychodera flava</i>              | HEMI_Ptychodera_flava | Genome        | PRJDB3182  |

|                |                                       |                               |               |             |
|----------------|---------------------------------------|-------------------------------|---------------|-------------|
| Hemichordata   | <i>Saccoglossus kowalevskii</i>       | HEMI_Saccoglossus_kowalevskii | Genome        | PRJNA42857  |
| Hemichordata   | <i>Schizocardium cf. braziliense</i>  | HEMI_Sbra                     | Transcriptome | SRR1695467  |
| Hemichordata   | <i>Torquaratoridae sp. Antarctica</i> | HEMI_Tbah                     | Transcriptome | SRR1695469  |
| Kinorhyncha    | <i>Echinoderes dujardini</i>          | KINO_Eduj                     | Transcriptome | PRJNA523695 |
| Kinorhyncha    | <i>Pycnophyes kielensis</i>           | KINO_Pkie                     | Transcriptome | SRX448021   |
| Loricifera     | <i>Armorloricus elegans</i>           | LORI_Arc                      | Transcriptome | SRX1120677  |
| Micrognathozoa | <i>Limnognathia maerski</i>           | MICR_Limn                     | Transcriptome | SRX1121929  |
| Mollusca       | <i>Biomphalaria glabrata</i>          | MOLL_Biomphalaria_glabrata    | Genome        | PRJNA290623 |
| Mollusca       | <i>Crassostrea gigas</i>              | MOLL_Crassostrea_gigas        | Genome        | PRJNA276446 |
| Mollusca       | <i>Chiton olivaceus</i>               | MOLL_Cton                     | Transcriptome | SRX205322   |
| Mollusca       | <i>Hydatina physis</i>                | MOLL_Hphy                     | Transcriptome | SRX644677   |
| Mollusca       | <i>Lottia gigantea</i>                | MOLL_Lottia_gigantea          | Genome        | PRJNA259762 |
| Mollusca       | <i>Leptochiton rugatus</i>            | MOLL_Lrug                     | Transcriptome | SRX731464   |
| Mollusca       | <i>Monodonta labio</i>                | MOLL_Mlab                     | Transcriptome | SRX64468    |
| Mollusca       | <i>Neomenia carinata</i>              | MOLL_Nmna                     | Transcriptome | SRX1049974  |
| Mollusca       | <i>Nautilus pompilus</i>              | MOLL_Npom                     | Transcriptome | SRX2867110  |
| Mollusca       | <i>Octopus bimaculoides</i>           | MOLL_Obim                     | Genome        | PRJNA305125 |
| Mollusca       | <i>Proneomenia custodiens</i>         | MOLL_Pcus                     | Transcriptome | SRX729551   |
| Mollusca       | <i>Pomacea caniculata</i>             | MOLL_Pomacea_caniculata       | Genome        | PRJNA471795 |
| Mollusca       | <i>Solemya velum</i>                  | MOLL_Svel                     | Transcriptome | SRX091478   |
| Nematozoa      | <i>Caenorhabditis elegans</i>         | NEMA_Celg                     | Genome        | PRJNA158    |
| Nematozoa      | <i>Diploscapter pachys</i>            | NEMA_Diploscapter_pachys      | Genome        | PRJNA280107 |
| Nematozoa      | <i>Haemonchus contortus</i>           | NEMA_Hcon                     | Genome        | PRJEB506    |
| Nematozoa      | <i>Loa loa</i>                        | NEMA_Lloa                     | Genome        | PRJNA60051  |
| Nematozoa      | <i>Pristionchus pacificus</i>         | NEMA_Ppac                     | Genome        | PRJNA12644  |

|                  |                                    |                               |               |             |
|------------------|------------------------------------|-------------------------------|---------------|-------------|
| Nemato da        | <i>Panagrellus redivivus</i>       | NEMA_Pred                     | Genome        | PRJNA186477 |
| Nemato da        | <i>Romanomermis culicivorax</i>    | NEMA_Rcul                     | Genome        | PRJEB1358   |
| Nemato da        | <i>Strongyloides ratti</i>         | NEMA_Strongyloides_ratti      | Genome        | PRJNA304930 |
| Nemato da        | <i>Trichuris muris</i>             | NEMA_Tmur                     | Genome        | PRJNA304929 |
| Nemato da        | <i>Trichinella patagoniensis</i>   | NEMA_Trichinella_patagonensis | Genome        | PRJNA257433 |
| Nemato da        | <i>Trichinella spiralis</i>        | NEMA_Tspi                     | Genome        | PRJNA66457  |
| Nemertea         | <i>Argonemertes australiensis</i>  | NEME_Aaus                     | Transcriptome | SRX646169   |
| Nemertea         | <i>Baseodiscus unicolor</i>        | NEME_Buni                     | Transcriptome | SRX644738   |
| Nemertea         | <i>Carinoma hamanako</i>           | NEME_Cham                     | Transcriptome | SRX643224   |
| Nemertea         | <i>Hubrechtella ijimai</i>         | NEME_Hiji                     | Transcriptome | SRX644663   |
| Nemertea         | <i>Notospermus geniculatus</i>     | NEME_Notospermus_geniculatus  | Genome        | PRJNA393252 |
| Nemertea         | <i>Protopelagonemertes beebei</i>  | NEME_Peeb                     | Transcriptome | SRX646186   |
| Nematomorpha     | <i>Paragordius varius</i>          | NEMM_Gord                     | Transcriptome | ERP021314   |
| Nematomorpha     | <i>Nectonema munidae</i>           | NEMM_Nect                     | Transcriptome | PRJNA523701 |
| Nemertodermatida | <i>Ascoparia sp.</i>               | NEMO_Aasco                    | Transcriptome | SRX1343822  |
| Nemertodermatida | <i>Flagellophora sp. Bocas</i>     | NEMO_Flag                     | Transcriptome | SRR8641368  |
| Nemertodermatida | <i>Meara stichopi</i>              | NEMO_Mers                     | Transcriptome | SRX1343814  |
| Nemertodermatida | <i>Nemertoderma westbladi</i>      | NEMO_Nemw                     | Transcriptome | SRX1343819  |
| Onychophora      | <i>Ooperipatellus sp.</i>          | ONYC_Oope                     | Transcriptome | PRJNA523702 |
| Onychophora      | <i>Peripatopsis overbergiensis</i> | ONYC_Pcap                     | Transcriptome | SRX451023   |
| Onychophora      | <i>Peripatooides sp.</i>           | ONYC_Pept                     | Transcriptome | PRJNA523703 |

|                 |                                    |                             |               |                                                                                                                                       |
|-----------------|------------------------------------|-----------------------------|---------------|---------------------------------------------------------------------------------------------------------------------------------------|
| Onychophora     | <i>Epipeperipatus</i> sp.          | ONYC_Per                    | Transcriptome | PRJNA523712                                                                                                                           |
| Orthonectida    | <i>Intoshia lineai</i>             | ORTH_Intoshia_linei         | Genome        | PRJNA316116                                                                                                                           |
| Phoronida       | <i>Phoronopsis harmeri</i>         | PHOR_Ph                     | Transcriptome | SRX1121914                                                                                                                            |
| Phoronida       | <i>Phoronis australis</i>          | PHOR_Pharonis_australis     | Genome        | PRJNA393252                                                                                                                           |
| Phoronida       | <i>Phoronis psammophila</i>        | PHOR_Ppsa                   | Transcriptome | SRX731473                                                                                                                             |
| Placozoa        | <i>Hoilungia hongkongensis</i>     | PLAC_Hoilungia              | Genome        | <a href="https://bitbucket.org/molpalmuc/hoilungia-genome/downloads/">https://bitbucket.org/molpalmuc/hoilungia-genome/downloads/</a> |
| Placozoa        | <i>Trichoplax adhaerens</i>        | PLAC_Tadh                   | Genome        | PRJNA30931                                                                                                                            |
| Platyhelminthes | <i>Bothrioplana semperi</i>        | PLAT_Bsem                   | Transcriptome | SRX980750                                                                                                                             |
| Platyhelminthes | <i>Echinococcus multilocularis</i> | PLAT_Ecmu                   | Genome        | PRJNA308738                                                                                                                           |
| Platyhelminthes | <i>Geocentrophora applanata</i>    | PLAT_Gapp                   | Transcriptome | SRX981000                                                                                                                             |
| Platyhelminthes | <i>Gnosonesimida</i> sp. IV        | PLAT_Gnos                   | Transcriptome | SRX997152                                                                                                                             |
| Platyhelminthes | <i>Hymenolepis microstoma</i>      | PLAT_Hymenolepis_microstoma | Genome        | PRJNA308734                                                                                                                           |
| Platyhelminthes | <i>Macrostomum lignano</i>         | PLAT_Macrostomum_lignano    | Genome        | PRJNA371498                                                                                                                           |
| Platyhelminthes | <i>Monocelis fusca</i>             | PLAT_Mfus                   | Transcriptome | SRX998836                                                                                                                             |
| Platyhelminthes | <i>Prostheceraeus vittatus</i>     | PLAT_Pvit                   | Transcriptome | SRX999630                                                                                                                             |
| Platyhelminthes | <i>Rhynchomesostoma rostratum</i>  | PLAT_Rros                   | Transcriptome | SRX999311                                                                                                                             |
| Platyhelminthes | <i>Schmidtea mediterranea</i>      | PLAT_Schmidtea_mediterranea | Genome        | PRJNA379262                                                                                                                           |
| Platyhelminthes | <i>Stenostomum leucops</i>         | PLAT_Sleu                   | Transcriptome | SRX951992                                                                                                                             |
| Platyhelminthes | <i>Schistosoma mansoni</i>         | PLAT_Sman                   | Genome        | PRJNA39937                                                                                                                            |
| Porifera        | <i>Amphimedon queenslandica</i>    | PORI_Aque                   | Genome        | PRJNA66531                                                                                                                            |
| Porifera        | <i>Aphrocallistes vastus</i>       | PORI_Avas                   | Transcriptome | SRX404392                                                                                                                             |
| Porifera        | <i>Corticium candelabrum</i>       | PORI_Ccan                   | Transcriptome | SRX148422                                                                                                                             |
| Porifera        | <i>Clathrina clathrus</i>          | PORI_Ccla                   | Transcriptome | ERX1845173                                                                                                                            |
| Porifera        | <i>Crella elegans</i>              | PORI_Cele                   | Transcriptome | SRX216926                                                                                                                             |



|             |                                         |                                |               |                                                                                           |
|-------------|-----------------------------------------|--------------------------------|---------------|-------------------------------------------------------------------------------------------|
| Porifera    | <i>Chondrilla nucula</i>                | PORI_Cnuc                      | Transcriptome | ERX1842676                                                                                |
| Porifera    | <i>Cliona varians</i>                   | PORI_Cvar                      | Transcriptome | SRX333053                                                                                 |
| Porifera    | <i>Ircinia fasciculata</i>              | PORI_Ifas                      | Transcriptome | SRX4517958                                                                                |
| Porifera    | <i>Oscarella carmela</i>                | PORI_Oscarella_carmela         | Genome        | <a href="http://www.compagen.org/datasets.html">http://www.compagen.org/datasets.html</a> |
| Porifera    | <i>Petrosia ficiformis</i>              | PORI_Pfic                      | Transcriptome | SRX151865                                                                                 |
| Porifera    | <i>Pseudospongosorites suberitoides</i> | PORI_Psub                      | Transcriptome | SRX468859                                                                                 |
| Porifera    | <i>Sycon coactum</i>                    | PORI_Scoa                      | Transcriptome | SRX151867                                                                                 |
| Porifera    | <i>Spongilla lacustris</i>              | PORI_Slac                      | Transcriptome | SRX470277                                                                                 |
| Porifera    | <i>Stylisha carteri</i>                 | PORI_Stylisha_carteri          | Transcriptome | <a href="http://www.compagen.org/datasets.html">http://www.compagen.org/datasets.html</a> |
| Porifera    | <i>Sycon ciliatum</i>                   | PORI_Sycon_ciliatum            | Transcriptome | <a href="http://www.compagen.org/datasets.html">http://www.compagen.org/datasets.html</a> |
| Porifera    | <i>Xestospongia testudinaria</i>        | PORI_Xestospongia_testudinaria | Transcriptome | <a href="http://www.compagen.org/datasets.html">http://www.compagen.org/datasets.html</a> |
| Priapulida  | <i>Meiopriapulus fijiensis</i>          | PRIA_Meio                      | Transcriptome | PRJNA438779                                                                               |
| Priapulida  | <i>Priapulus caudatus</i>               | PRIA_Priapulus_caudatus        | Genome        | PRJNA303167                                                                               |
| Rotifera    | <i>Adineta vaga</i>                     | ROTI_Avag                      | Genome        | PRJEB1171                                                                                 |
| Rotifera    | <i>Brachionus calyciflorus</i>          | ROTI_Bcal                      | Genome        | PRJNA404029                                                                               |
| Rotifera    | <i>Echinorhynchus gadi</i>              | ROTI_Egad                      | Transcriptome | SRX1121912                                                                                |
| Rotifera    | <i>Macracanthorhynchus hirudinaceus</i> | ROTI_Mhir                      | Transcriptome | ERX420859                                                                                 |
| Rotifera    | <i>Rotaria rotatoria</i>                | ROTI_Rrot                      | Transcriptome | ERX420860                                                                                 |
| Tardigrada  | <i>Echiniscus testudo</i>               | TARD_Echiniscus                | Transcriptome | MH550112                                                                                  |
| Tardigrada  | <i>Hypsibius dujardini</i>              | TARD_Hypsibius_dujardini       | Genome        | PRJNA360556                                                                               |
| Tardigrada  | <i>Millnesium tardigradum</i>           | TARD_Mtar                      | Transcriptome | SRX2662933                                                                                |
| Tardigrada  | <i>Paramacrobiotus richtersi</i>        | TARD_Prigh                     | Transcriptome | MH550113                                                                                  |
| Tardigrada  | <i>Ramazzotius varieornatus</i>         | TARD_Ramazzotius_varieornatus  | Genome        | PRJNA348338                                                                               |
| Tardigrada  | <i>Ramazzotius sp.</i>                  | TARD_Rama                      | Transcriptome | SRX2528404                                                                                |
| Urochordata | <i>Ciona intestinalis</i>               | UROC_Ciona_intestinalis        | Genome        | PRJNA187185                                                                               |

|                              |                                     |                               |               |                                                                                                                                                                       |
|------------------------------|-------------------------------------|-------------------------------|---------------|-----------------------------------------------------------------------------------------------------------------------------------------------------------------------|
| Urochor data                 | <i>Oikopleura dioica</i>            | UROC_Oikopleura_dioica        | Genome        | PRJNA36567                                                                                                                                                            |
| Xenoturbellida               | <i>Xenoturbella bocki</i>           | XENO_XbJC                     | Transcriptome | SRX134381                                                                                                                                                             |
|                              |                                     |                               |               |                                                                                                                                                                       |
| <b>OUTGROUPS</b>             |                                     |                               |               |                                                                                                                                                                       |
| Fungi                        | <i>Saccharomyces cerevisiae</i>     | ZOUT_Saccharomyces            | Genome        | UP000002311                                                                                                                                                           |
| Fungi                        | <i>Spizellomyces punctatus</i>      | ZOUT_Spizellomyces            | Genome        | UP000053201                                                                                                                                                           |
| Fungi                        | <i>Allomyces macrogynus</i>         | ZOUT_Allomyces                | Genome        | UP000054350                                                                                                                                                           |
| Nucleariidae                 | <i>Fonticula alba</i>               | ZOUT_Fonticula                | Genome        | UP000030693                                                                                                                                                           |
| Nucleariidae                 | <i>Parvularia atlantis</i>          | ZOUT_Parvularia               | Transcriptome | SRR1617645                                                                                                                                                            |
| Corallochytrea               | <i>Corallochytrium limacisporum</i> | ZOUT_Corallochytrium          | Genome        | <a href="https://figshare.com/articles/Genome_-_Corallochytrium_limacisporum/5426470">https://figshare.com/articles/Genome_-_Corallochytrium_limacisporum/5426470</a> |
| Ichthyospora, Dermocystida   | <i>Chromosphaera perkinsii</i>      | ZOUT_Chromosphaera            | Genome        | <a href="https://figshare.com/articles/Genome_-_Chromosphaera_perkinsii/5426494">https://figshare.com/articles/Genome_-_Chromosphaera_perkinsii/5426494</a>           |
| Ichthyospora, Ichthyophonida | <i>Creolimax fragrantissima</i>     | ZOUT_Creolimax_fragrantissima | Genome        | PRJNA377365                                                                                                                                                           |
| Ichthyospora, Ichthyophonida | <i>Abeoforma whisleri</i>           | ZOUT_Abeoforma                | Genome        | <a href="https://figshare.com/articles/Genome_-_Abeoforma_whisleri_/5426458">https://figshare.com/articles/Genome_-_Abeoforma_whisleri_/5426458</a>                   |
| Ichthyospora, Ichthyophonida | <i>Ichthyophonus hoferi</i>         | ZOUT_Ichthyophonus            | Genome        | <a href="https://figshare.com/articles/Genome_-_Ichthyophonus_hoferi/5426488">https://figshare.com/articles/Genome_-_Ichthyophonus_hoferi/5426488</a>                 |
| Ichthyospora, Ichthyophonida | <i>Pirum gemmata</i>                | ZOUT_Pirum                    | Genome        | <a href="https://figshare.com/articles/Genome_-_Pirum_gemmata/5426506">https://figshare.com/articles/Genome_-_Pirum_gemmata/5426506</a>                               |
| Ichthyospora, Ichthyophonida | <i>Sphaeroforma arctica</i>         | ZOUT_Sphaeroforma             | Genome        | PRJNA20463                                                                                                                                                            |
| Filasterea                   | <i>Capsaspora owczarzkii</i>        | ZOUT_Capsaspora               | Genome        | PRJNA193613                                                                                                                                                           |

|                  |                                 |                  |        |             |
|------------------|---------------------------------|------------------|--------|-------------|
| Choanoflagellata | <i>Monosiga<br/>bervicollis</i> | ZOUT_Monosiga    | Genome | PRJNA28133  |
| Choanoflagellata | <i>Salpingoeca rosetta</i>      | ZOUT_Salpingoeca | Genome | PRJNA193541 |
